# Supplementary material for: Oxidative Degradation of Tetracycline by Magnetite and Persulfate: Performance, Water Matrix Effect, and Reaction Mechanism
Source: MDPI journal article supplement (doi:10.3390/nano11092292), 2021-09-03
Supplement: s1 [file s1]

## **Oxidative degradation of tetracycline by magnetite and persulfate: performance, water matrix effect, and reaction mechanism**

Deokhui Lee<sup>a</sup>, Soyeon Kim<sup>a</sup>, Kai Tang<sup>b</sup>, Michael De Volder<sup>c</sup>, Yuhoon Hwang<sup>a,1</sup>

<sup>a</sup>Department of Environmental Engineering, Seoul National University of Science and Technology, Seoul 01811, Republic of Korea

<sup>b</sup>Department of Environmental Engineering, Technical University of Denmark, Konges-Lyngby, Denmark

<sup>c</sup>Institute for Manufacturing, Department of Engineering, University of Cambridge, Cambridge CB3 0FS, United Kingdom

### **Table of contents**

**Text S1.** HPLC-MS/MS operational parameters for identifying the transformation product of tetracycline removed by magnetite/PS

**Table S1.** Common parameters of municipal effluent wastewater

**Table S2.** Transformation products (TPs) of tetracycline removed by Fe<sub>3</sub>O<sub>4</sub>/PS

**Figure S1.** HPLC peak when TC was removed by only Fe<sub>3</sub>O<sub>4</sub>

**Figure S2.** HPLC peak when TC was removed by Fe<sub>3</sub>O<sub>4</sub>/PS

**Figure S3.** Reduction in TC concentration in (red) municipal effluent and (black) ultrapure water ([Fe<sub>3</sub>O<sub>4</sub>] = 1 g/L, [PS]<sub>0</sub> = 1 mM, [TC]<sub>0</sub> = 41.6 μM)

**Figure S4.** The total ion chromatogram (HPLC-MS/MS) of tetracycline removed by Fe<sub>3</sub>O<sub>4</sub>/PS and its transformation products in samples taken over the reaction time

**Figure S5.** Intensity of the fragment chart analysis relating to the transformation products of TC eluted at different retention times

**Text S1. HPLC-MS/MS operational parameters for identifying the transformation product of tetracycline removed by Fe<sub>3</sub>O<sub>4</sub>/PS**

The HPLC system was a Vanquish Flex, provided by Thermo Fisher Scientific, USA, and the column used for chromatographic separation was a C18 column (4.6 x 50 mm, 3.5 μm, Eclipse Agilent, USA). The temperature of the HPLC column oven was 35°C, and the pump flow rate was 0.3 mL/min. The sample injection volume was 10 μL, and the HPLC gradient was formed by changing the mix ratio of Milli-Q water, including 0.1% of formic acid (solvent A), and methanol, including 0.1% of formic acid (solvent B). The tandem mass spectrometer equipped with a triple quadrupole was a TSQ Quantis from Thermo Fisher Scientific, USA. For the full-scan mode, the gradient began with 5% B, followed by a linear increase of gradient B up to 100% within 15 mins, following which 100% B was kept running for another 5 mins. Initial gradient conditions were also re-established for 3 mins. A positive ESI ionization mode (ESI<sup>+</sup>) was applied, and the spray voltage was fixed to 4000 V. The scanning m/z range was from 60 Da to 600 Da

**Table S1.** Common parameters of municipal effluent wastewater.

|                                      | Concentrations |
|--------------------------------------|----------------|
| pH                                   | 6.89           |
| TOC (mg/L)                           | 12.25          |
| Cl <sup>-</sup> (mg/L)               | 77.04          |
| NO <sub>3</sub> <sup>-</sup> (mg/L)  | 39.08          |
| SO <sub>4</sub> <sup>2-</sup> (mg/L) | 50.88          |
| Na <sup>+</sup> (mg/L)               | 52.55          |
| K <sup>+</sup> (mg/L)                | 11.63          |
| Mg <sup>2+</sup> (mg/L)              | 6.43           |
| Ca <sup>2+</sup> (mg/L)              | 32.2           |
| Mn <sup>2+</sup> (μg/L)              | 31.42          |
| Co <sup>2+</sup> (μg/L)              | 0.17           |
| Ni <sup>2+</sup> (μg/L)              | 8.01           |
| Cu <sup>2+</sup> (μg/L)              | 0.83           |

**Table S2.** Transformation products (TPs) of tetracycline removed by Fe<sub>3</sub>O<sub>4</sub>/PS.

| Products     | m/z value | Retention time (min) | Formula                                                       | Structure |
|--------------|-----------|----------------------|---------------------------------------------------------------|-----------|
| Tetracycline | 445       | 5.09                 | C <sub>22</sub> H <sub>24</sub> N <sub>2</sub> O <sub>8</sub> |           |
| TP 1         | 344       | 10.69                | C <sub>18</sub> H <sub>16</sub> O <sub>7</sub>                |           |
| TP 2         | 358       | 11.06                | C <sub>19</sub> H <sub>16</sub> O <sub>7</sub>                |           |
| TP 3         | 274       | 11.77                | C <sub>16</sub> H <sub>17</sub> O <sub>4</sub>                |           |
|              |           |                      | C <sub>16</sub> H <sub>15</sub> O <sub>4</sub>                |           |
| TP 4         | 290       | 12.02                | C <sub>16</sub> H <sub>18</sub> O <sub>5</sub>                |           |
| TP 5         | 256       | 12.92                | C <sub>14</sub> H <sub>24</sub> O <sub>4</sub>                |           |
| TP 6         | 284       | 13.82                | C <sub>15</sub> H <sub>24</sub> O <sub>5</sub>                |           |

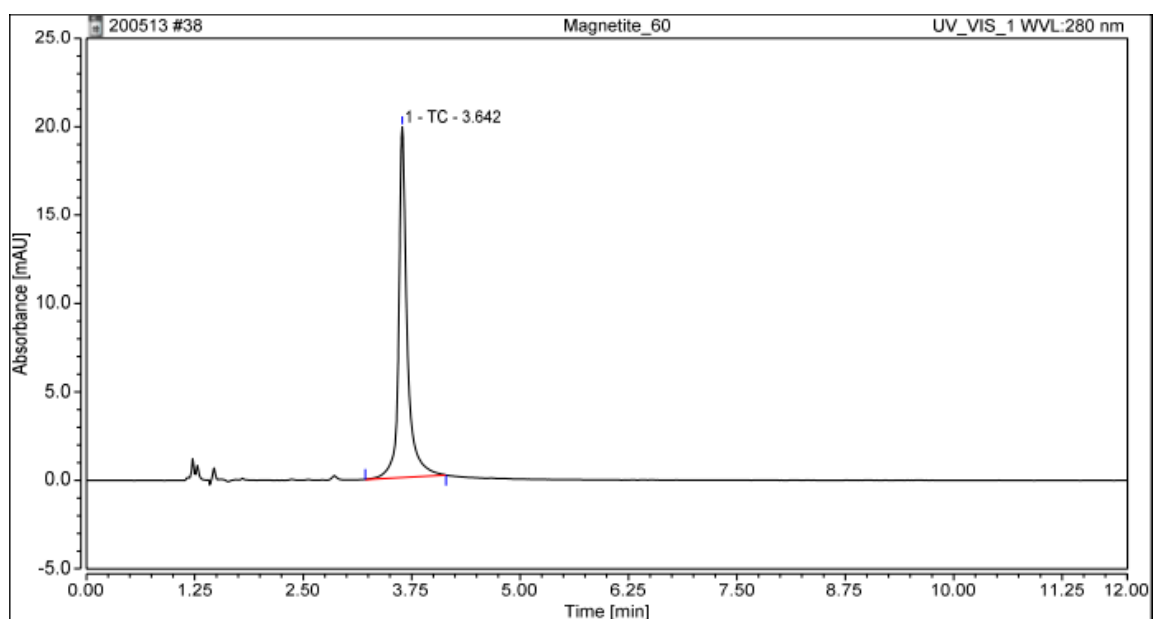

**Figure S1.** HPLC peak of TC treated by only  $\text{Fe}_3\text{O}_4$ .

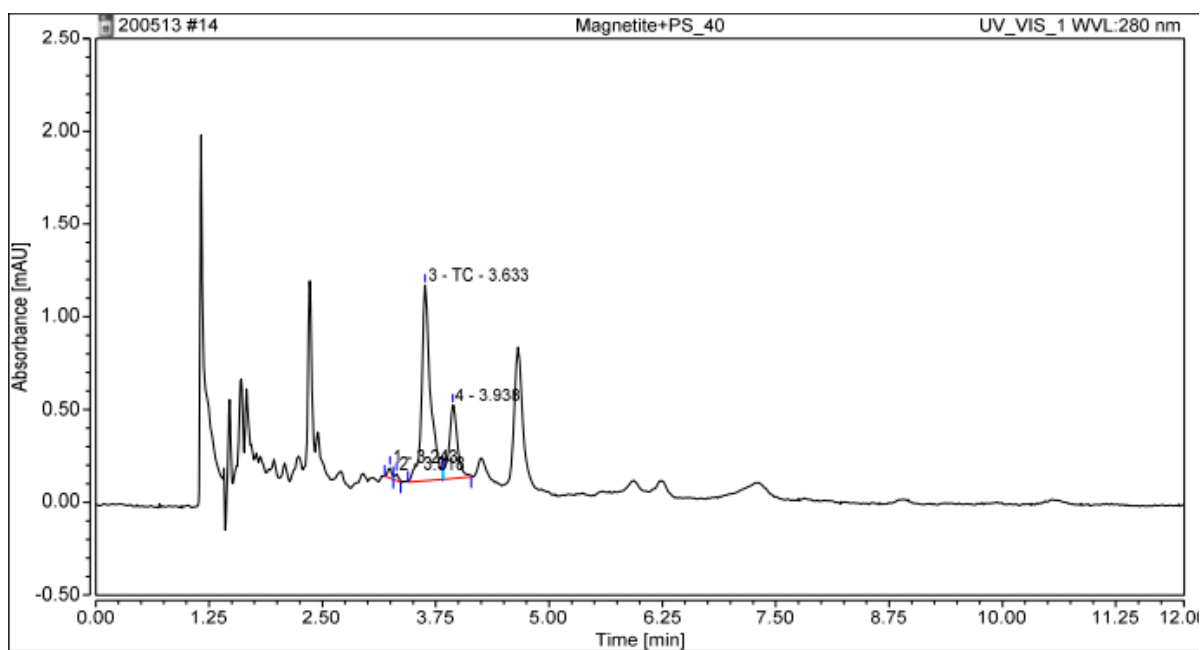

**Figure S2.** HPLC peak of TC treated by  $\text{Fe}_3\text{O}_4/\text{PS}$ .

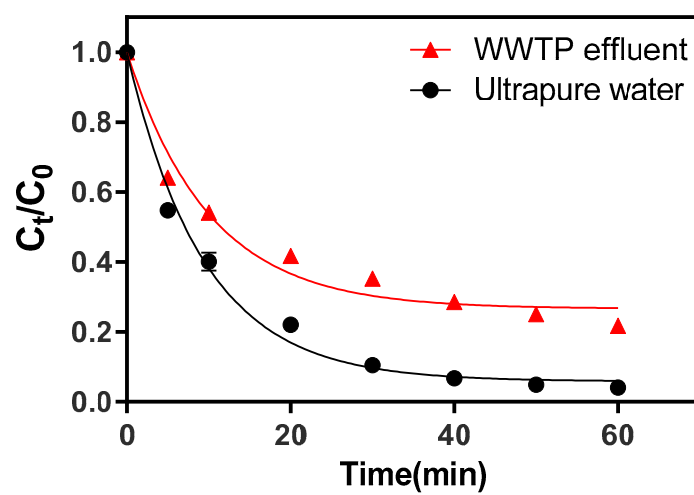

**Figure S3.** Reduction in TC concentration in (red) WWTP effluent and (black) ultrapure water

( $[\text{Fe}_3\text{O}_4] = 1 \text{ g/L}$ ,  $[\text{PS}]_0 = 1 \text{ mM}$ ,  $[\text{TC}]_0 = 41.6 \text{ } \mu\text{M}$ ).

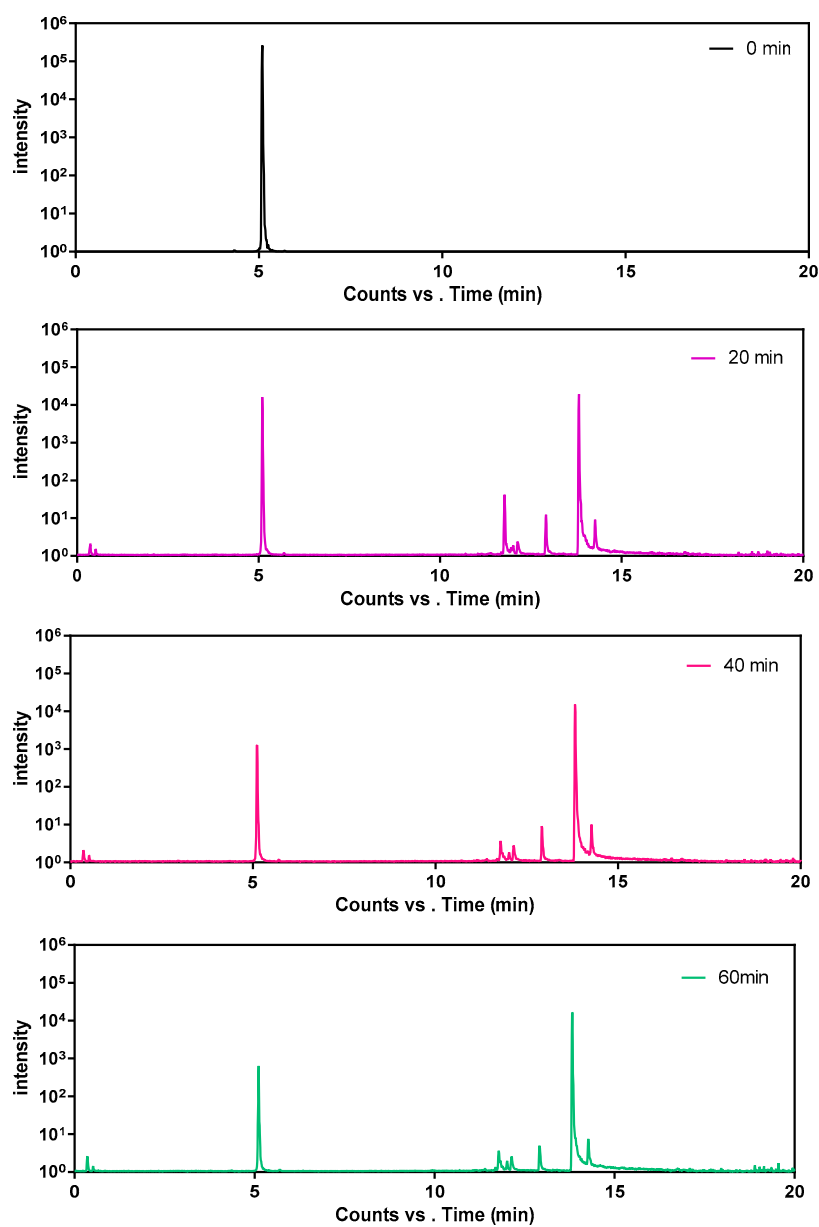

**Figure S4.** The total ion chromatogram (HPLC-MS/MS) of tetracycline removed by  $\text{Fe}_3\text{O}_4/\text{PS}$  and its transformation products in samples taken over the reaction time

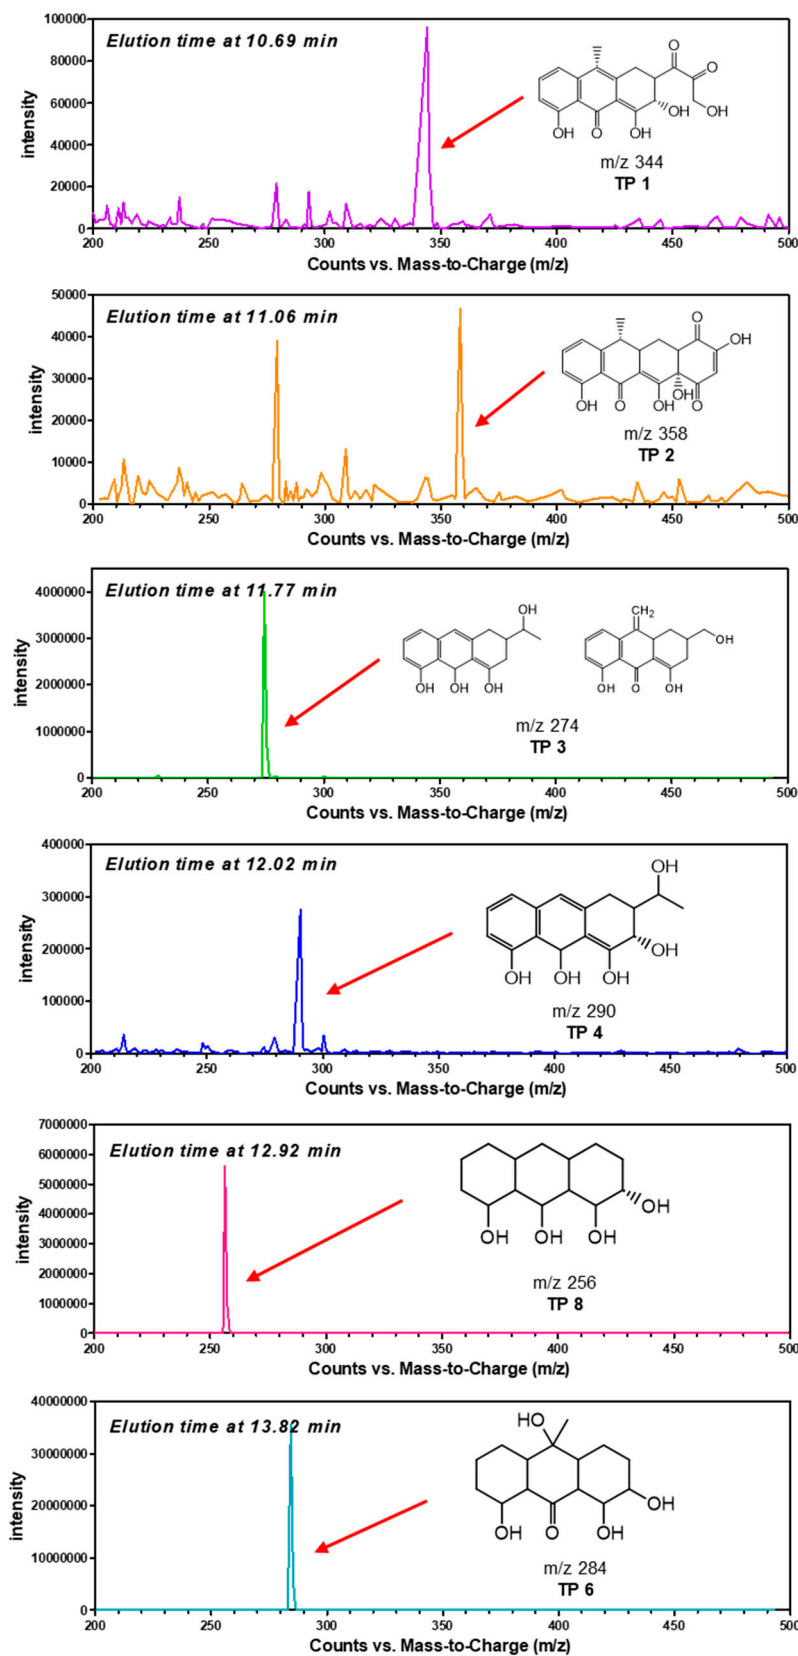

**Figure S5.** Intensity of the fragment chart analysis relating to the transformation products of TC eluted at different retention times.
